# Supplementary material for: Electrochemically stable frustrated Lewis pairs on dual-metal hydroxides for electrocatalytic CO2 reduction
Source: Royal Society of Chemistry journal article supplement (doi:10.1039/d3dt00144j), 2023-01-01
Supplement: d3dt00144j1.pdf [file d3dt00144j1.pdf]

†Electronic Supplementary Information (ESI) available.

‡ These authors contributed equally to this work.

## Supporting Information

### Electrochemically stable frustrated Lewis pairs on dual-metal hydroxide for electrocatalytic CO<sub>2</sub> reduction

Weining Zhang,<sup>‡a,b,c</sup> Yuandong Yan,<sup>‡b</sup> Jing Wang,<sup>‡d</sup> Zhenhua Yang,<sup>b</sup> Taozhu Li,<sup>b</sup> Hu Li,<sup>b</sup> Shicheng Yan,<sup>b\*</sup> Tao Yu<sup>a</sup>, Weiliu Fan<sup>d</sup> and Zhigang Zou<sup>a,b</sup>

<sup>a</sup> Collaborative Innovation Center of Advanced Microstructures, Jiangsu Key Laboratory for Nano Technology, National Laboratory of Solid State Microstructures, School of Physics, Nanjing University, No. 22 Hankou Road, Nanjing, Jiangsu 210093, P. R. China

<sup>b</sup> Eco-materials and Renewable Energy Research Center (ERERC), College of Engineering and Applied Sciences, Nanjing University, No. 22 Hankou Road, Nanjing, Jiangsu 210093, P. R. China

E-mail: yscfei@nju.edu.cn

<sup>c</sup> School of Physics and Physical Engineering, Qufu Normal University, Qufu 273165, P. R. China

<sup>d</sup> School of Chemistry and Chemical Engineering, Shandong University, Jinan 250100, P. R. China

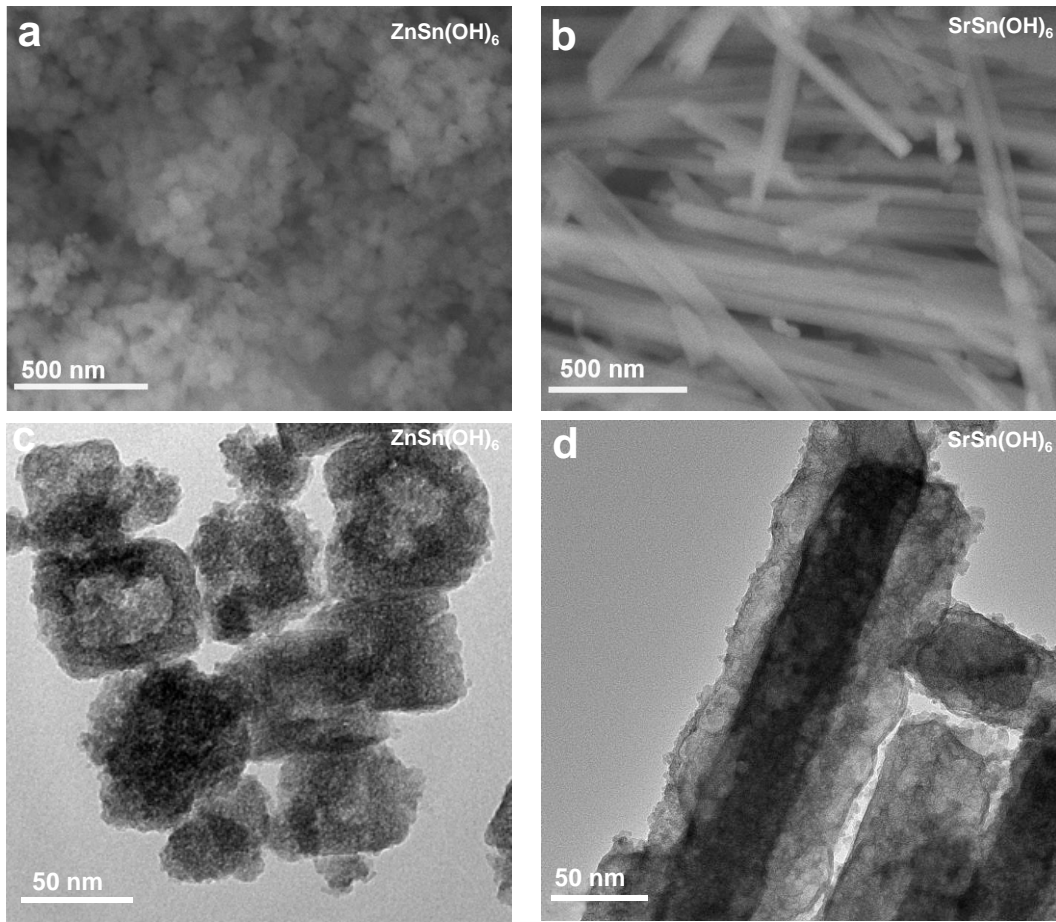

**Fig. S1.** The SEM and TEM images for as-prepared ZnSn(OH)<sub>6</sub> and SrSn(OH)<sub>6</sub> samples.

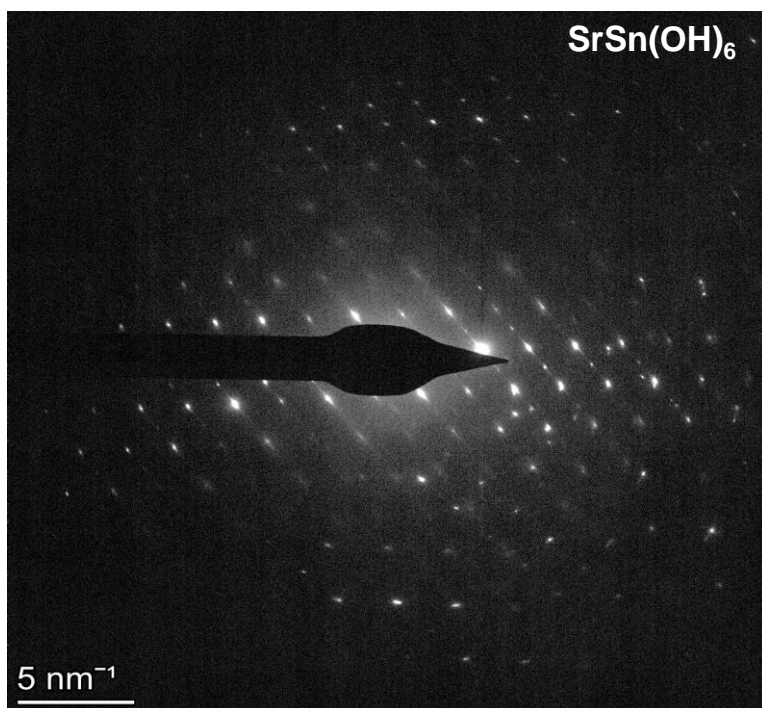

**Fig. S2.** The selected-area electron diffraction (SAED) image of SrSn(OH)<sub>6</sub>.

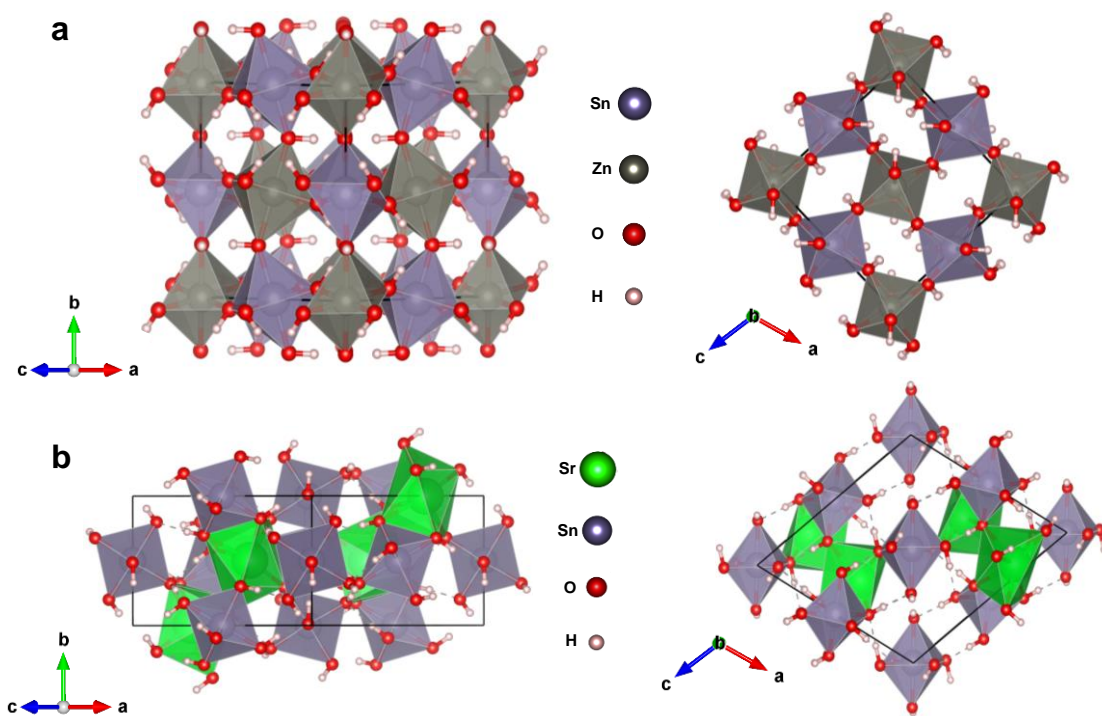

**Fig. S3.** The optimized cell structures for ZnSn(OH)<sub>6</sub> (a) and SrSn(OH)<sub>6</sub> (b).

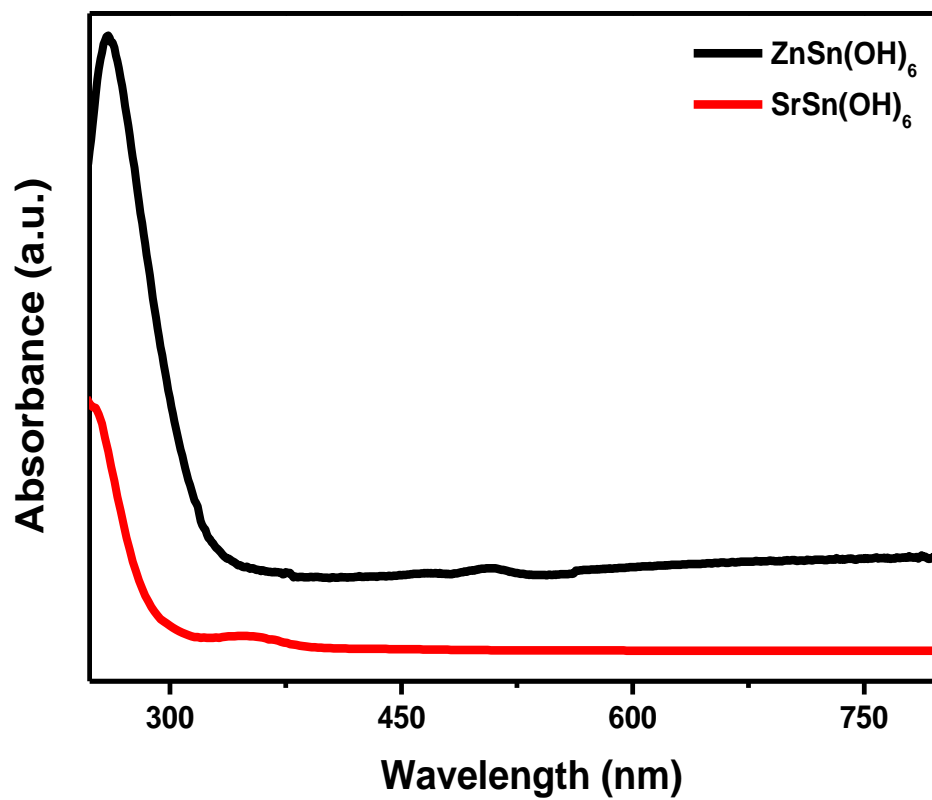

**Fig. S4.** The UV-Vis absorption spectra for ZnSn(OH)<sub>6</sub> and SrSn(OH)<sub>6</sub> samples.

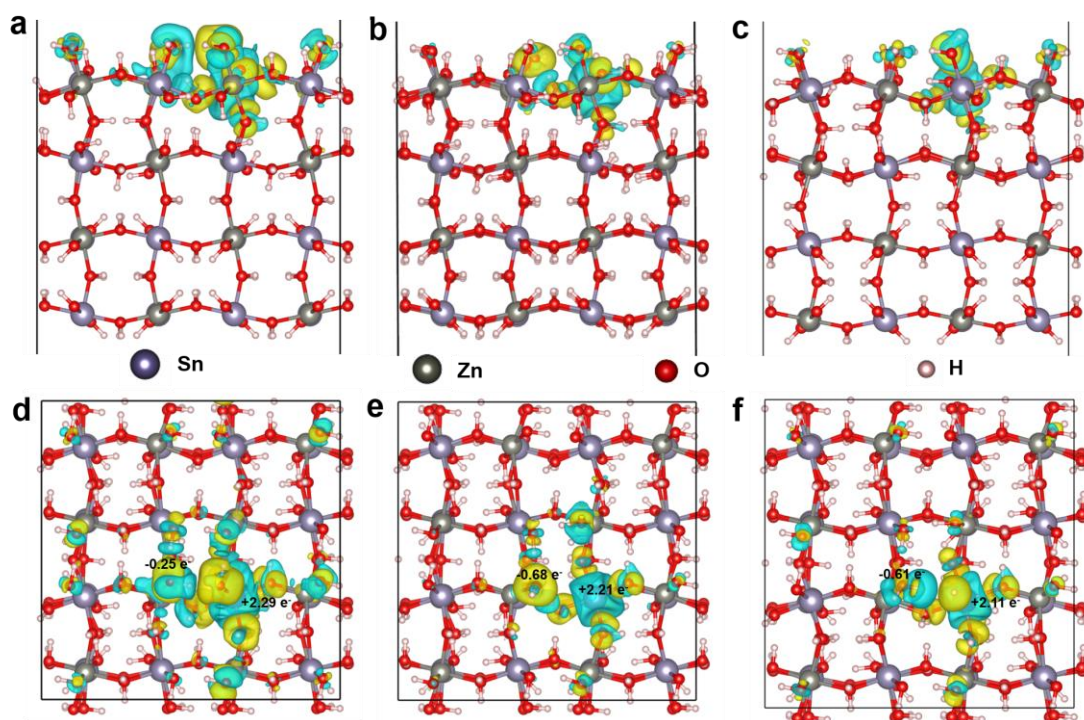

**Fig. S5.** Charge density difference plots of  $\text{ZnSn(OH)}_6$ : (a) and (d) Pristine  $\text{ZnSn(OH)}_6$  (Sn-OH and Zn-OH sites). (b) and (e) FLPs on  $\text{ZnSn(OH)}_6$  (Sn- $\text{O}_{\text{Vs}}$  and Zn-OH sites). (c) and (f) Protonated FLPs on  $\text{ZnSn(OH)}_6$  (Sn-H and Zn- $\text{OH}_2$  sites). Specifically, the Bader charges of Sn-OH and Zn-OH sites were respectively +2.29 e and -0.25 e. After forming the FLPs, the Bader charges of Sn- $\text{O}_{\text{Vs}}$  and Zn-OH sites were respectively +2.21 e and -0.68 e. After the protonation, the Bader charge of Sn-H and Zn- $\text{OH}_2$  sites were +2.11 e and -0.61 e, respectively.

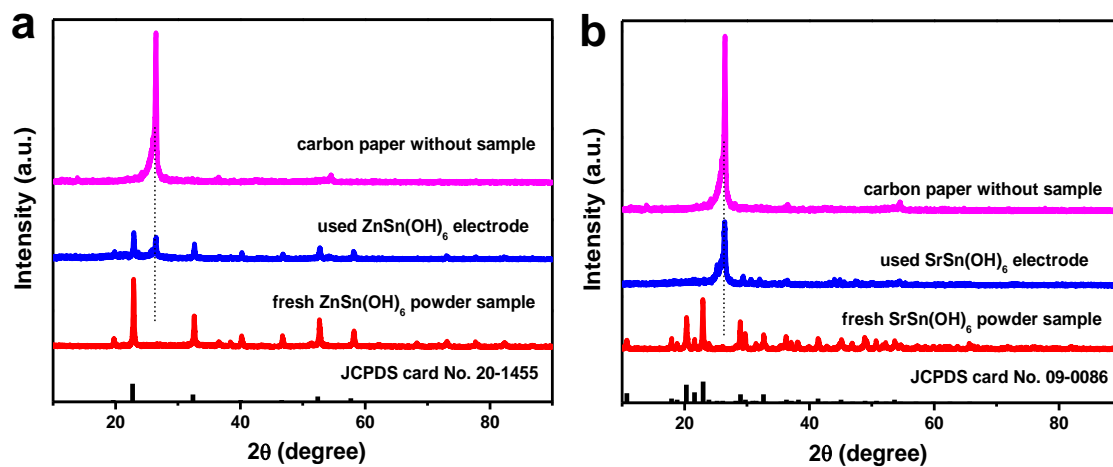

**Fig. S6.** The XRD patterns for ZnSn(OH)<sub>6</sub> and SrSn(OH)<sub>6</sub> before and after CO<sub>2</sub> reduction reaction.

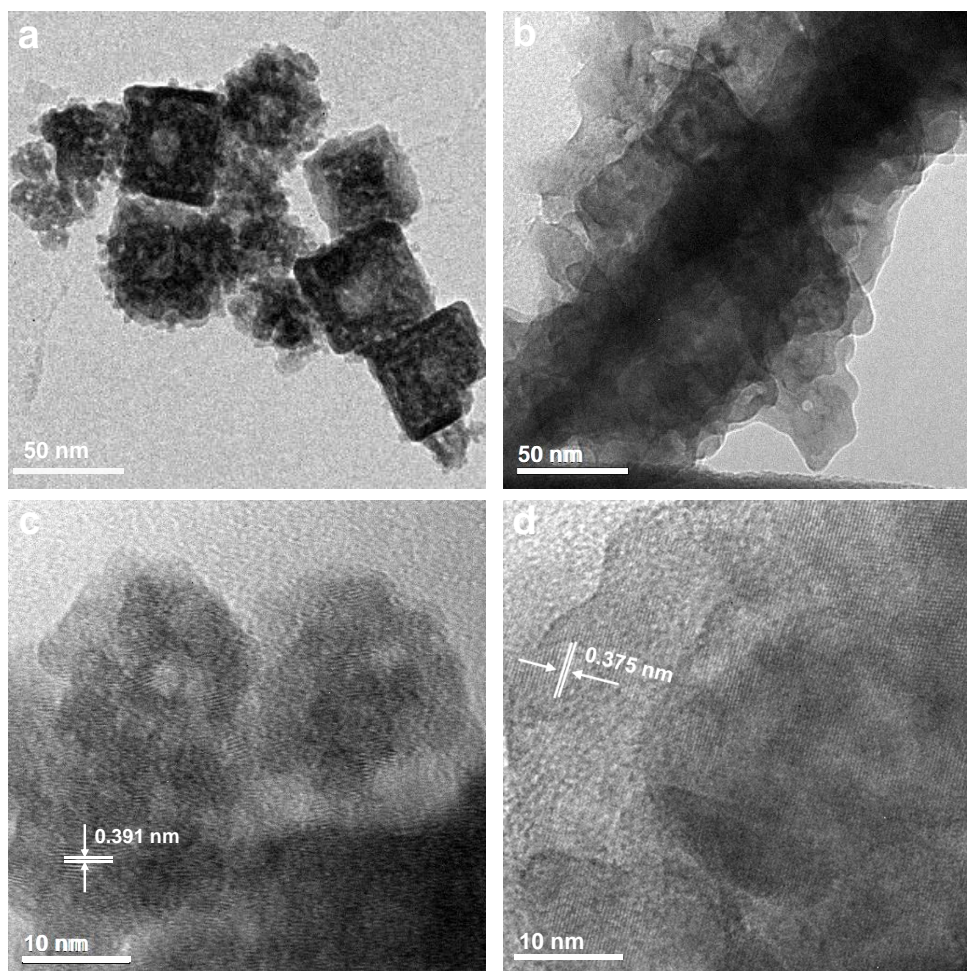

**Fig. S7.** (a) and (c) TEM and HRTEM images for ZnSn(OH)<sub>6</sub> after CO<sub>2</sub> reduction reaction.  
(b) and (d) TEM and HRTEM images for SrSn(OH)<sub>6</sub> after CO<sub>2</sub> reduction reaction.



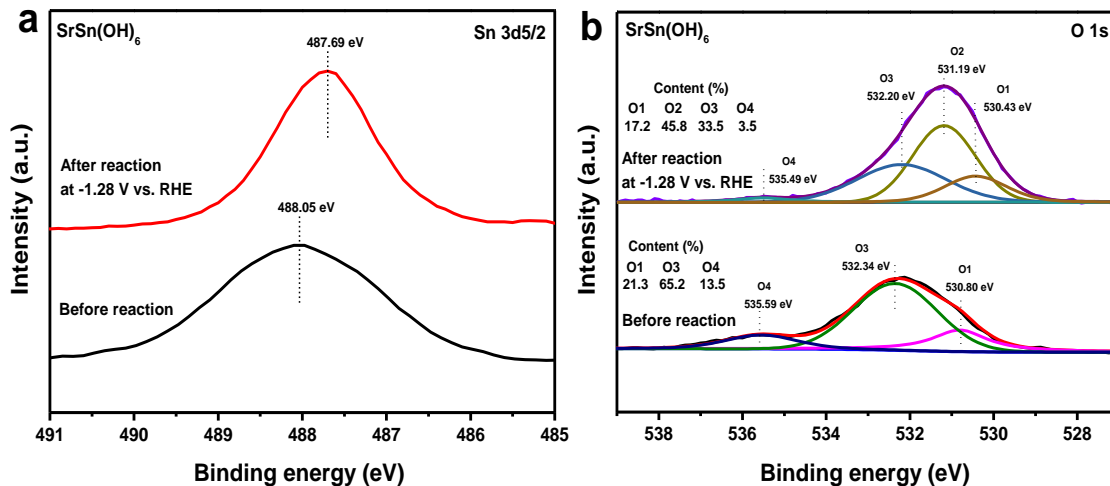

**Fig. S8.** The Sn 3d<sub>5/2</sub> (a) and O 1s (b) XPS spectra for SrSn(OH)<sub>6</sub> before and after CO<sub>2</sub> reduction reaction. Wherein, O1 represents the lattice oxygen or M-OH without vacancies, O2 represents the surface O<sub>Vs</sub> or defects with low oxygen coordination, O3 and O4 represent the surface-adsorbed -OH, H<sub>2</sub>O or CO<sub>2</sub> molecules.<sup>1-4</sup>

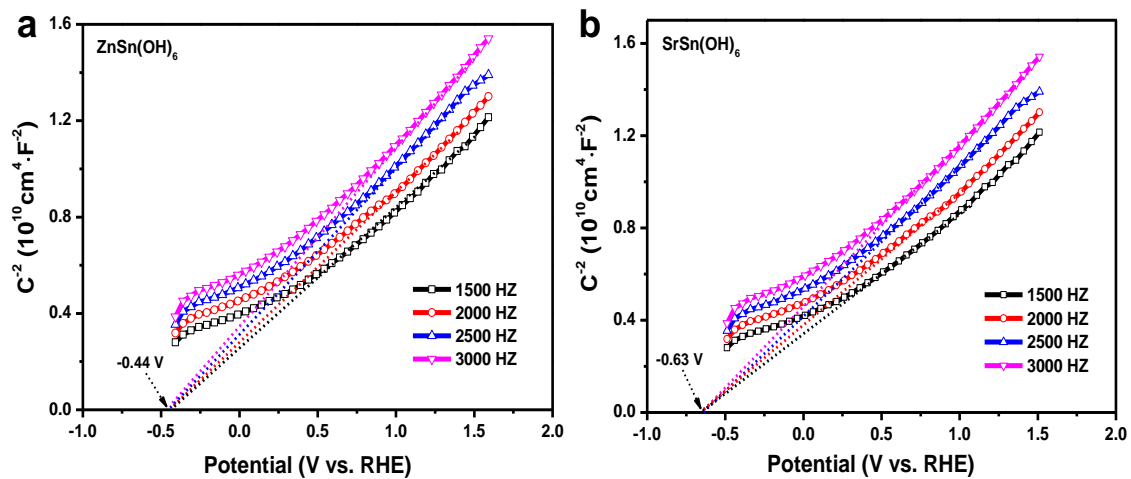

**Fig. S9.** Mott-Schottky plots of ZnSn(OH)<sub>6</sub> (a) and SrSn(OH)<sub>6</sub> (b) with different frequencies.

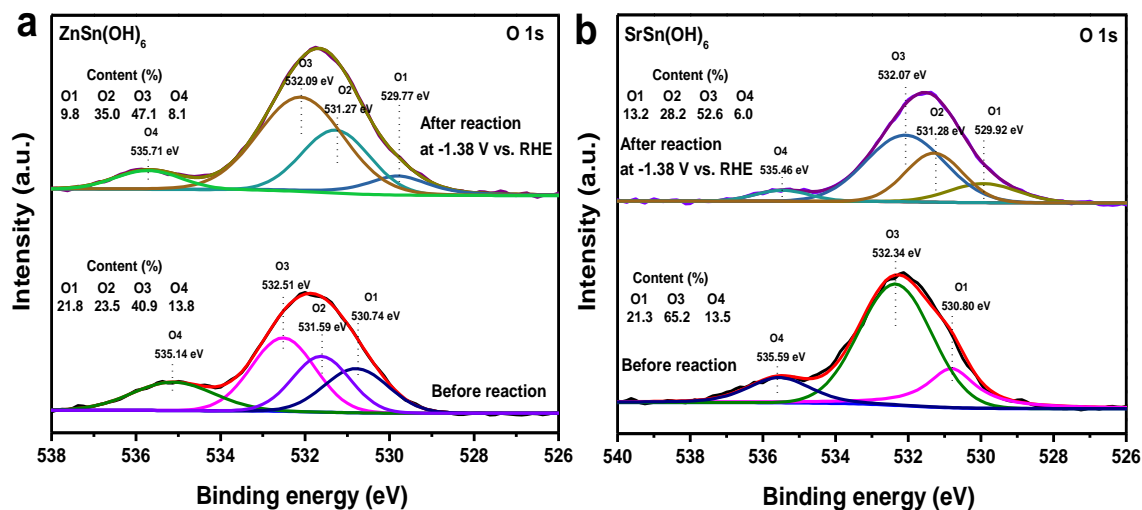

**Fig. S10.** The O 1s XPS spectra for ZnSn(OH)<sub>6</sub> (a) and SrSn(OH)<sub>6</sub> (b) before and after CO<sub>2</sub> reduction reaction. Wherein, O1 represents the lattice oxygen or M-OH without vacancies, O2 represents the surface O<sub>V</sub>s or defects with low oxygen coordination, O3 and O4 represent the surface-adsorbed -OH, H<sub>2</sub>O or CO<sub>2</sub> molecules.<sup>1-4</sup>

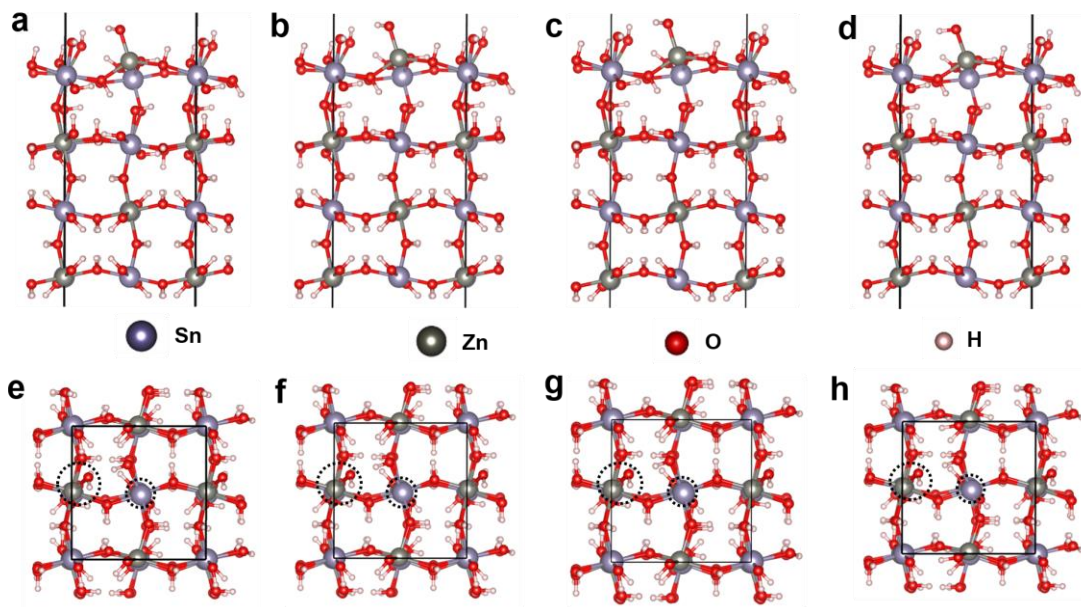

**Fig. S11.** The structure of FLPs (Sn-O<sub>v</sub>---Zn-OH) under different vertical electrical field with  $E_z = 0 \text{ V/\AA}$  (a and e),  $-0.1 \text{ V/\AA}$  (b and f),  $-0.5 \text{ V/\AA}$  (c and g) and  $-1 \text{ V/\AA}$  (d and h).<sup>5,6</sup>

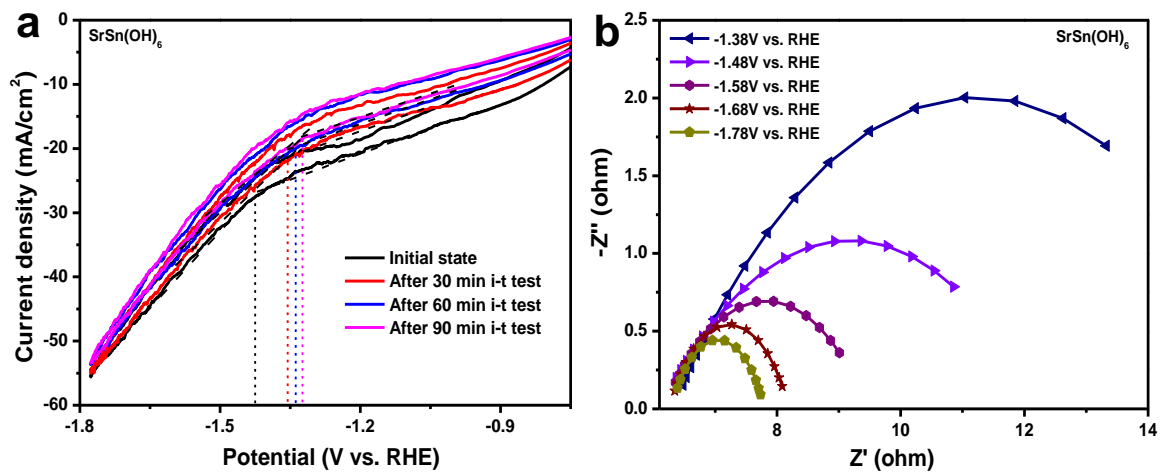

**Fig. S12.** The CV curves ranged from -0.75 V to -1.78 V vs. RHE (a) and EIS spectrum ranged from -1.38 V to -1.78 V vs. RHE (b) of SrSn(OH)<sub>6</sub> sample.

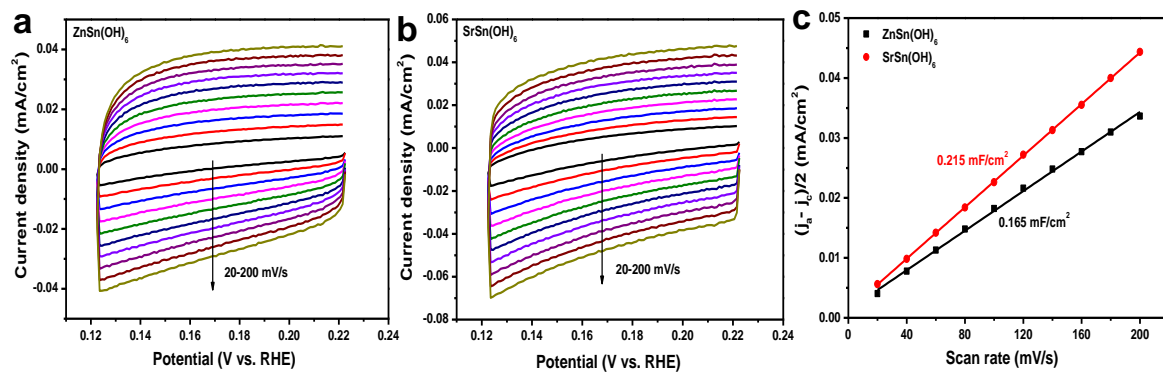

**Fig. S13.** The CV curves of ZnSn(OH)<sub>6</sub> (a) and SrSn(OH)<sub>6</sub> (b) in CO<sub>2</sub> saturated 0.5 M KHCO<sub>3</sub> electrolyte at the scan rate from 20 mV/s to 200 mV/s. (c) The linear relationship of the current density versus different scan rates of ZnSn(OH)<sub>6</sub> and SrSn(OH)<sub>6</sub>.

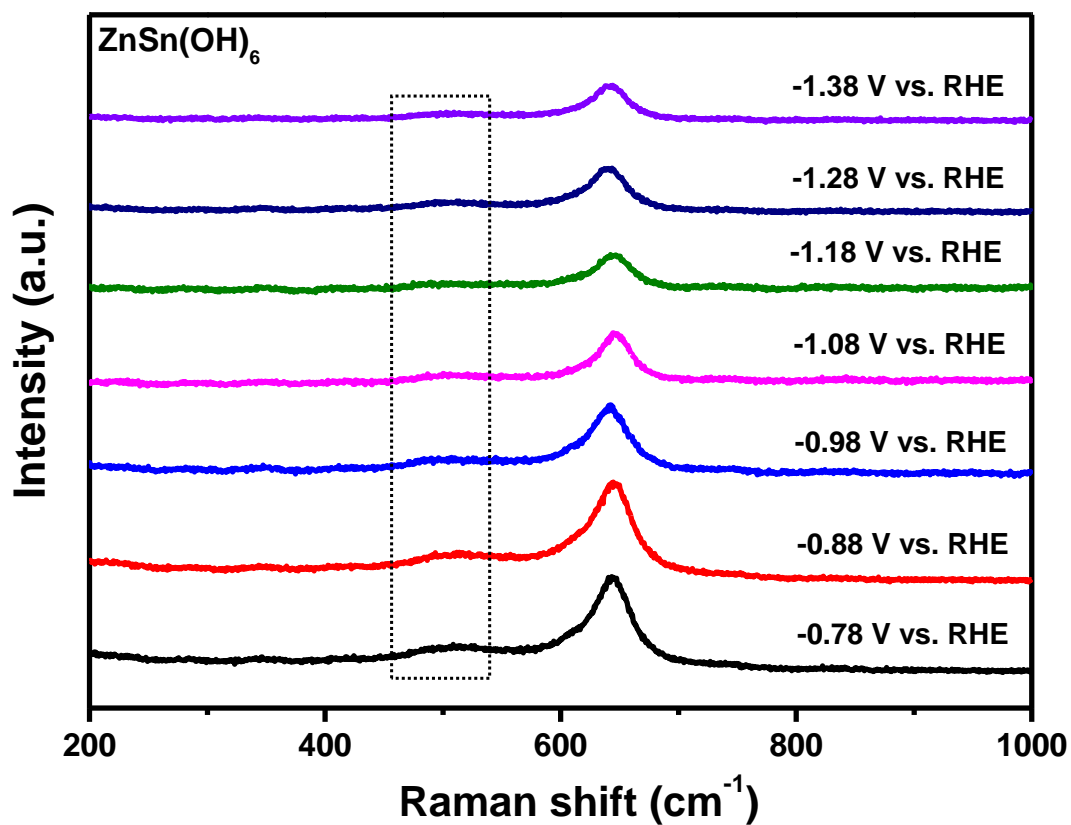

**Fig. S14.** In situ Raman spectrum of ZnSn(OH)<sub>6</sub> with different potentials during the catalytic process.

In Raman spectrum, the peak at 645 cm<sup>-1</sup> was assigned to the anti-symmetric stretching of M-O atoms (M represents metals), which was relevant to the in-plane vibration,<sup>7</sup> and the adjacent broad peak between 460 and 520 cm<sup>-1</sup> was attributed to the translational vibration of hydroxyl,<sup>8</sup> confirming the presence of M-OH during reaction, further indicating the stable existence of FLPs (Sn-O<sub>v</sub>---Zn-OH) during catalytic process.

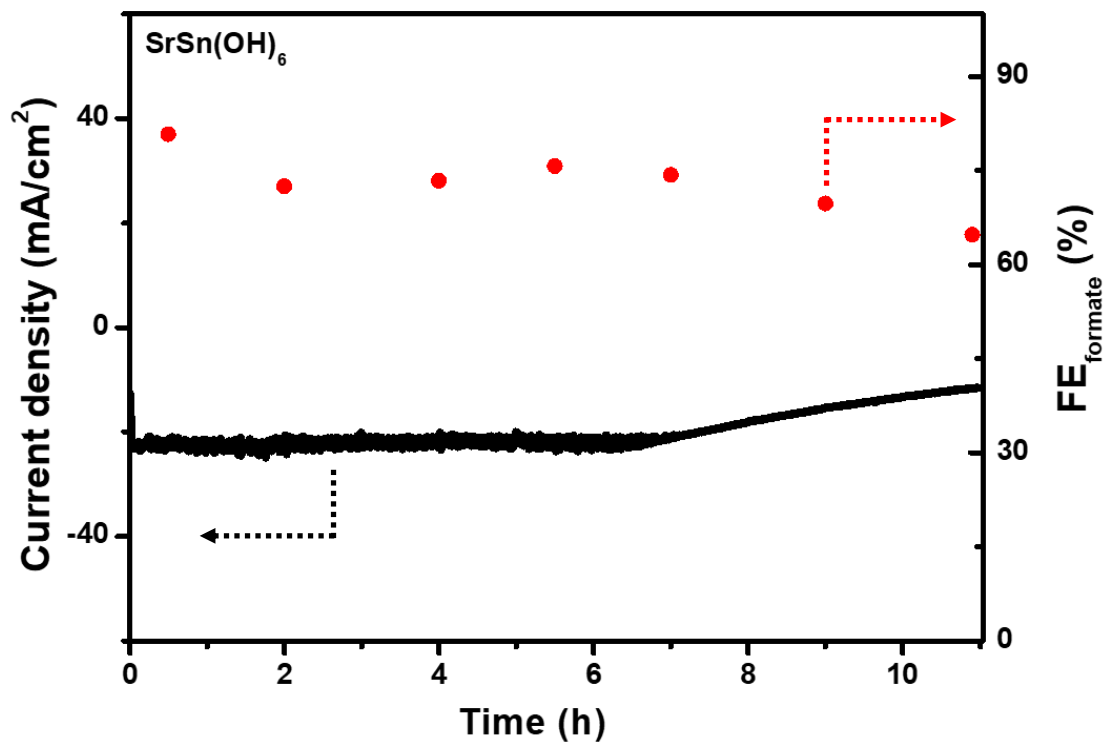

Fig. S15. Stability measurement of  $\text{SrSn(OH)}_6$  by constant potential electrolysis at -1.18 V vs RHE.



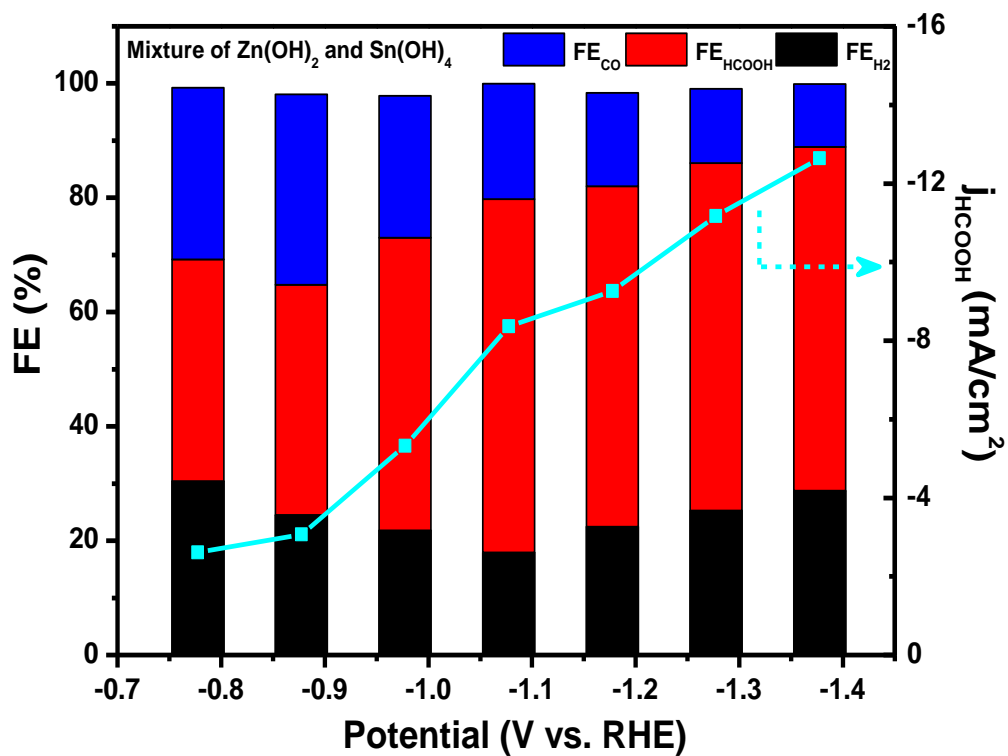

**Fig. S16.** Faradaic efficiencies (FE) and partial current density of formate generation on Zn(OH)<sub>2</sub> and Sn(OH)<sub>4</sub> mixture at different applied potentials.

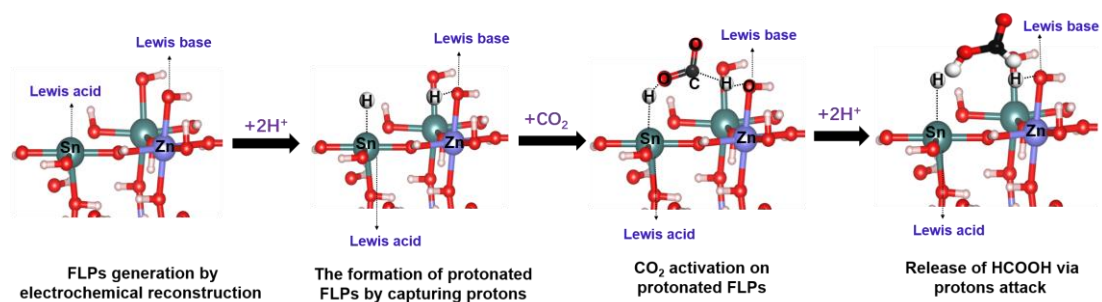

**Fig. S17.** The schematic diagram of CO<sub>2</sub> reduction mechanism over FLPs on surface of ZnSn(OH)<sub>6</sub>.

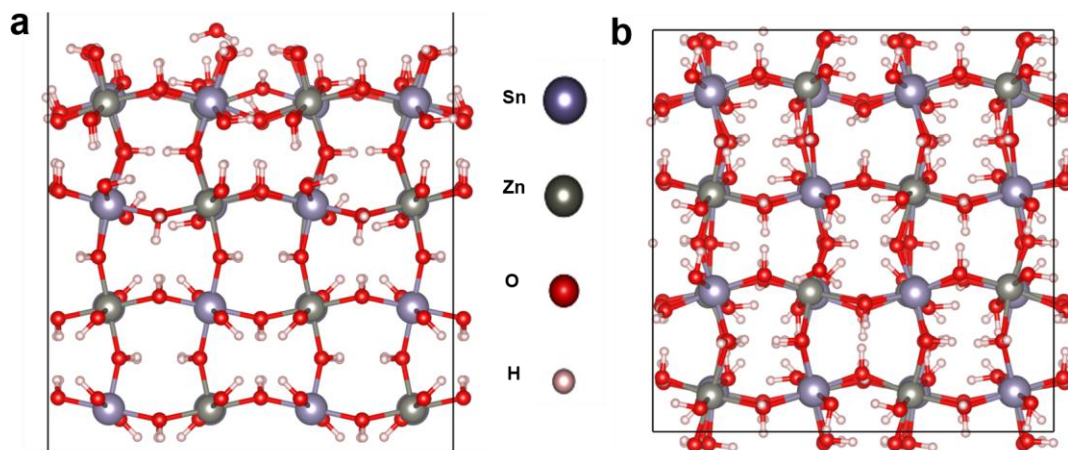

**Fig. S18.** The final optimal active site structure for ZnSn(OH)<sub>6</sub>.

**Table S1.** The Faraday efficiency (FE) of CO<sub>2</sub>RR for ZnSn(OH)<sub>6</sub> under different potentials.

| <b>Potential<br/>(V vs. RHE)</b> | <b>FE<sub>H2</sub><br/>(%)</b> | <b>FE<sub>HCOOH</sub><br/>(%)</b> | <b>FE<sub>CO</sub><br/>(%)</b> | <b>FE<sub>CH4</sub><br/>(%)</b> |
|----------------------------------|--------------------------------|-----------------------------------|--------------------------------|---------------------------------|
| -0.78                            | 4.12                           | 74.18                             | 19.24                          | 1.24                            |
| -0.88                            | 6.60                           | 80.33                             | 11.25                          | 1.22                            |
| -0.98                            | 5.80                           | 80.63                             | 10.13                          | 1.68                            |
| -1.08                            | 6.69                           | 82.28                             | 7.66                           | 1.63                            |
| -1.18                            | 9.03                           | 82.74                             | 5.16                           | 1.61                            |
| -1.28                            | 12.34                          | 79.29                             | 5.04                           | 1.74                            |
| -1.38                            | 19.91                          | 72.32                             | 3.56                           | 2.02                            |

**Table S2.** The Faraday efficiency (FE) of CO<sub>2</sub>RR for SrSn(OH)<sub>6</sub> for CO<sub>2</sub>RR under different potentials.

| <b>Potential<br/>(V vs. RHE)</b> | <b>FE<sub>H2</sub><br/>(%)</b> | <b>FE<sub>HCOOH</sub><br/>(%)</b> | <b>FE<sub>CO</sub><br/>(%)</b> | <b>FE<sub>CH4</sub><br/>(%)</b> |
|----------------------------------|--------------------------------|-----------------------------------|--------------------------------|---------------------------------|
| -0.78                            | 11.04                          | 57.80                             | 26.27                          | 1.53                            |
| -0.88                            | 4.42                           | 66.60                             | 23.56                          | 1.59                            |
| -0.98                            | 4.11                           | 74.95                             | 16.99                          | 1.82                            |
| -1.08                            | 4.20                           | 80.43                             | 13.74                          | 0.99                            |
| -1.18                            | 9.94                           | 80.69                             | 6.63                           | 0.89                            |
| -1.28                            | 15.07                          | 76.23                             | 5.53                           | 1.18                            |
| -1.38                            | 32.55                          | 57.86                             | 5.81                           | 1.38                            |

**Table S3.** The Faraday efficiency (FE) of CO<sub>2</sub>RR for the physical mixture of Zn(OH)<sub>2</sub> and Sn(OH)<sub>4</sub> under different potentials.

| Potential<br>(V vs. RHE) | FE <sub>H<sub>2</sub></sub><br>(%) | FE <sub>HCOOH</sub><br>(%) | FE <sub>CO</sub><br>(%) |
|--------------------------|------------------------------------|----------------------------|-------------------------|
| -0.78                    | 30.42                              | 38.82                      | 30.02                   |
| -0.88                    | 24.51                              | 40.26                      | 33.35                   |
| -0.98                    | 21.83                              | 51.20                      | 24.82                   |
| -1.08                    | 17.94                              | 61.82                      | 20.20                   |
| -1.18                    | 22.44                              | 59.56                      | 16.35                   |
| -1.28                    | 25.30                              | 60.79                      | 12.97                   |
| -1.38                    | 28.75                              | 60.15                      | 10.99                   |

## References

1. H. Yan, Q. Shen, Y. Sun, S. Zhao, R. Lu, M. Gong, Y. Liu, X. Zhou, X. Jin, X. Feng, X. Chen, D. Chen, C. Yang, *ACS Catal.*, 2021, **11**, 6371-6383.
2. Y.-F. Jiang, N. Jiang, K. Liang, C.-Z. Yuan, X.-X. Fang, A.-W. Xu, *J. Mater. Chem. A*, 2019, **7**, 7932-7938.
3. P. D. Schulze, S. L. Shaffer, R. L. Hance, D. L. Utley, *J. Vac. Sci. Technol. A*, 1983, **1**, 97-99.
4. M. K. Rajumon, M. S. Hegde, C. N. R. Rao, *Catal. Lett.*, 1988, **1**, 351-360.
5. Y. Li, S. X. Yang and J. B. Li, *J. Phys. Chem. C*, 2016, **118**, 23970-23976.
6. P. J. Feibelman, *Phys. Rev. B*, 2001, **64**, 125403.
7. Y. Cao, Q. Ye, F. Wang, X. Fan, L. Hu, F. Wang, T. Zhai, H. Li, *Adv. Func. Mater.*, 2020, **30**, 2003733.
8. J. Hao, L. Yuan, Y. Zhu, M. Jaroniec, S.-Z. Qiao, *Adv. Mater.*, 2022, **34**, 2206963.
